# Supplementary material for: Effect of Brewing Water on the Antioxidant Capacity of Green Tea Infusion with DPPH Assay
Source: Hindawi journal article supplement (doi:10.1155/2022/7736117), 2022-01-04
Supplement: f1 [file 7736117.f1.docx]

# Effect of brewing water on the antioxidant capacity of green tea infusion with DPPH assay

Qing-Qing Cao,1, 2, # Yan-Qing Fu,1, # Cheng-Bin Zhang,1, 3 Yan Zhu,1 Jun-Feng Yin,1, * Daniel Granato,4 Predrag Putnik,5 and Yong-Quan Xu1, *

1 Tea Research Institute Chinese Academy of Agricultural Sciences, Key Laboratory of Tea Biology and Resources Utilization, Ministry of Agriculture, Hangzhou 310008, China.
2 Graduate School of Chinese Academy of Agricultural Sciences, Beijing 100081, China.

3 College of Life and Environmental Science, Hangzhou Normal University, Hangzhou 310036, China.

4 Department of Biological Sciences, Faculty of Science and Engineering, University of Limerick, Limerick V94 T9PX, Ireland.

5 Faculty of Food Technology and Biotechnology, University of Zagreb, Zagreb 10000, Croatia.

Correspondence: Yong-Quan Xu, [yqx33@126.com](mailto:yqx33@126.com); Jun-Feng Yin, yinjf@tricaas.com.

# These authors contributed equally to this study.

Figure S1: The synergistic effects of Ca2+ (A) and Mg2+ (B) of 40 mg/L on the antioxidant activity of EGCG solutions with different concentrations. Theoretical: the theoretical sum antioxidant activity of the two single solutions of EGCG and Ca2+ or Mg2+; Actual: the actual antioxidant activity of the mixed solution of EGCG with Ca2+ or Mg2+. The marks above the column show the significance of differences between Theoretical and Actual, ns indicates p > 0.05, * indicates p < 0.05, ** indicates p < 0.01.
